# Supplementary material for: Healthcare professional acceptance of telemonitoring for chronic care patients in primary care
Source: PubMed Central journal article supplement (PMC3520721; doi:10.1186/1472-6947-12-139), 2012-11-30
Supplement: 1472-6947-12-139-S1.pdf [file 1472-6947-12-139-S1.pdf]

# ¿What's your opinion on home telemonitoring ?

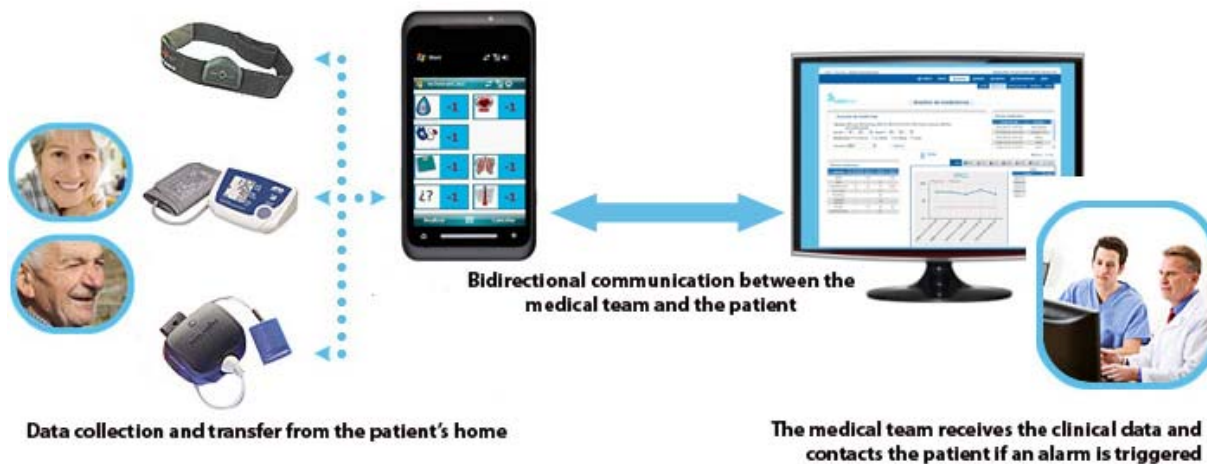

## PURPOSE OF THE QUESTIONNAIRE

To find out the opinion of health care professionals from Bilbao Primary Care Health Region on home telemonitoring.

The objective of this study is to find out your opinion on this new technology. Having had previous experience with home telemonitoring is not necessary to answer the questionnaire. The information will be analyzed confidentially.

**Please, complete this questionnaire. Your opinion is important.**

1. Sex:

Male       Female

2. Age:

- < 30 years
- 30-39 years
- 40-49 years
- 50-59 years
- > 60 years

3. Medical specialty:

- General physician
- Nurse
- Paediatrician

4. Your health centre : \_\_\_\_\_

5. Number of years in clinical practice: \_\_\_\_\_

6. Highest degree obtained (you can choose more than one option):

- 3-year certificate
- B.Sc.
- M.Sc.
- Ph.D.
- Other studies (Please specify):  
\_\_\_\_\_

7. I often use computing tools in my work:

Yes

No

8. I feel comfortable with information and communication technologies (e.g. e-mail, Internet, videoconference, on-line teaching, etc.):

Yes

No

9. I have already used telemonitoring devices to monitor my patients:

Yes

No

10. I am going to participate in the TELBIL study.

Yes

No

Here are 26 statements related to various factors that may be involved in the acceptance of telemonitoring as a working tool. Please, indicate your level of agreement with each of the following statements using the scale provided below:

\*\* Remember to **select a single option** for each statement.

| -3<br>Totally disagree | -2<br>Disagree | -1<br>Slightly disagree | 0<br>Neither agree nor disagree | 1<br>Slightly agree | 2<br>Agree | 3<br>Totally agree |
|------------------------|----------------|-------------------------|---------------------------------|---------------------|------------|--------------------|
|------------------------|----------------|-------------------------|---------------------------------|---------------------|------------|--------------------|

|                                                                                                                  |                          |                          |                          |                          |                          |                          |                          |
|------------------------------------------------------------------------------------------------------------------|--------------------------|--------------------------|--------------------------|--------------------------|--------------------------|--------------------------|--------------------------|
| 11. The use of the telemonitoring system (TMS) could help me to monitor my patients more rapidly                 | -3                       | -2                       | -1                       | 0                        | 1                        | 2                        | 3                        |
|                                                                                                                  | <input type="checkbox"/> | <input type="checkbox"/> | <input type="checkbox"/> | <input type="checkbox"/> | <input type="checkbox"/> | <input type="checkbox"/> | <input type="checkbox"/> |
| 12. I think that I could easily learn how to use the TMS                                                         | -3                       | -2                       | -1                       | 0                        | 1                        | 2                        | 3                        |
|                                                                                                                  | <input type="checkbox"/> | <input type="checkbox"/> | <input type="checkbox"/> | <input type="checkbox"/> | <input type="checkbox"/> | <input type="checkbox"/> | <input type="checkbox"/> |
| 13. I have the intention to use the TMS when it becomes available in my health centre                            | -3                       | -2                       | -1                       | 0                        | 1                        | 2                        | 3                        |
|                                                                                                                  | <input type="checkbox"/> | <input type="checkbox"/> | <input type="checkbox"/> | <input type="checkbox"/> | <input type="checkbox"/> | <input type="checkbox"/> | <input type="checkbox"/> |
| 14. The use of the TMS may imply major changes in my clinical practice                                           | -3                       | -2                       | -1                       | 0                        | 1                        | 2                        | 3                        |
|                                                                                                                  | <input type="checkbox"/> | <input type="checkbox"/> | <input type="checkbox"/> | <input type="checkbox"/> | <input type="checkbox"/> | <input type="checkbox"/> | <input type="checkbox"/> |
| 15. The use of the TMS could improve the monitoring of my patients                                               | -3                       | -2                       | -1                       | 0                        | 1                        | 2                        | 3                        |
|                                                                                                                  | <input type="checkbox"/> | <input type="checkbox"/> | <input type="checkbox"/> | <input type="checkbox"/> | <input type="checkbox"/> | <input type="checkbox"/> | <input type="checkbox"/> |
| 16. I think that it would be easy to perform the tasks necessary for the monitoring of my patients using the TMS | -3                       | -2                       | -1                       | 0                        | 1                        | 2                        | 3                        |
|                                                                                                                  | <input type="checkbox"/> | <input type="checkbox"/> | <input type="checkbox"/> | <input type="checkbox"/> | <input type="checkbox"/> | <input type="checkbox"/> | <input type="checkbox"/> |
| 17. Most of my patients will welcome the fact that I use the TMS                                                 | -3                       | -2                       | -1                       | 0                        | 1                        | 2                        | 3                        |
|                                                                                                                  | <input type="checkbox"/> | <input type="checkbox"/> | <input type="checkbox"/> | <input type="checkbox"/> | <input type="checkbox"/> | <input type="checkbox"/> | <input type="checkbox"/> |
| 18. I think that my health centre has the necessary infrastructure to support my use of the TMS                  | -3                       | -2                       | -1                       | 0                        | 1                        | 2                        | 3                        |
|                                                                                                                  | <input type="checkbox"/> | <input type="checkbox"/> | <input type="checkbox"/> | <input type="checkbox"/> | <input type="checkbox"/> | <input type="checkbox"/> | <input type="checkbox"/> |
| 19. Using the TMS could help me get the most out of my time to monitor my patients                               | -3                       | -2                       | -1                       | 0                        | 1                        | 2                        | 3                        |
|                                                                                                                  | <input type="checkbox"/> | <input type="checkbox"/> | <input type="checkbox"/> | <input type="checkbox"/> | <input type="checkbox"/> | <input type="checkbox"/> | <input type="checkbox"/> |
| 20. I believe that the monitoring carried out by TMS would be clear and easy to understand                       | -3                       | -2                       | -1                       | 0                        | 1                        | 2                        | 3                        |
|                                                                                                                  | <input type="checkbox"/> | <input type="checkbox"/> | <input type="checkbox"/> | <input type="checkbox"/> | <input type="checkbox"/> | <input type="checkbox"/> | <input type="checkbox"/> |
| 21. The use of the TMS is compatible with my work habits                                                         | -3                       | -2                       | -1                       | 0                        | 1                        | 2                        | 3                        |
|                                                                                                                  | <input type="checkbox"/> | <input type="checkbox"/> | <input type="checkbox"/> | <input type="checkbox"/> | <input type="checkbox"/> | <input type="checkbox"/> | <input type="checkbox"/> |
| 22. Most of my colleagues will welcome the fact that I use the TMS                                               | -3                       | -2                       | -1                       | 0                        | 1                        | 2                        | 3                        |
|                                                                                                                  | <input type="checkbox"/> | <input type="checkbox"/> | <input type="checkbox"/> | <input type="checkbox"/> | <input type="checkbox"/> | <input type="checkbox"/> | <input type="checkbox"/> |
| 23. Using the TMS could improve my performance in patients care                                                  | -3                       | -2                       | -1                       | 0                        | 1                        | 2                        | 3                        |
|                                                                                                                  | <input type="checkbox"/> | <input type="checkbox"/> | <input type="checkbox"/> | <input type="checkbox"/> | <input type="checkbox"/> | <input type="checkbox"/> | <input type="checkbox"/> |

| -3<br>Totally disagree | -2<br>Disagree | -1<br>Slightly disagree | 0<br>Neither agree nor disagree | 1<br>Slightly agree | 2<br>Agree | 3<br>Totally agree |
|------------------------|----------------|-------------------------|---------------------------------|---------------------|------------|--------------------|
|------------------------|----------------|-------------------------|---------------------------------|---------------------|------------|--------------------|

|                                                                                                         |                          |                          |                          |                          |                          |                          |                          |
|---------------------------------------------------------------------------------------------------------|--------------------------|--------------------------|--------------------------|--------------------------|--------------------------|--------------------------|--------------------------|
| 24. I think that the TMS is a flexible technology to interact with                                      | -3                       | -2                       | -1                       | 0                        | 1                        | 2                        | 3                        |
|                                                                                                         | <input type="checkbox"/> | <input type="checkbox"/> | <input type="checkbox"/> | <input type="checkbox"/> | <input type="checkbox"/> | <input type="checkbox"/> | <input type="checkbox"/> |
| 25. I have the intention to use the TMS when necessary to provide health care to my patients            | -3                       | -2                       | -1                       | 0                        | 1                        | 2                        | 3                        |
|                                                                                                         | <input type="checkbox"/> | <input type="checkbox"/> | <input type="checkbox"/> | <input type="checkbox"/> | <input type="checkbox"/> | <input type="checkbox"/> | <input type="checkbox"/> |
| 26. Health managers would welcome the fact that I use the TMS                                           | -3                       | -2                       | -1                       | 0                        | 1                        | 2                        | 3                        |
|                                                                                                         | <input type="checkbox"/> | <input type="checkbox"/> | <input type="checkbox"/> | <input type="checkbox"/> | <input type="checkbox"/> | <input type="checkbox"/> | <input type="checkbox"/> |
| 27. Using the TMS could facilitate the care of my patients                                              | -3                       | -2                       | -1                       | 0                        | 1                        | 2                        | 3                        |
|                                                                                                         | <input type="checkbox"/> | <input type="checkbox"/> | <input type="checkbox"/> | <input type="checkbox"/> | <input type="checkbox"/> | <input type="checkbox"/> | <input type="checkbox"/> |
| 28. I think I would find it easy to acquire the necessary skills to use the TMS                         | -3                       | -2                       | -1                       | 0                        | 1                        | 2                        | 3                        |
|                                                                                                         | <input type="checkbox"/> | <input type="checkbox"/> | <input type="checkbox"/> | <input type="checkbox"/> | <input type="checkbox"/> | <input type="checkbox"/> | <input type="checkbox"/> |
| 29. The use of the TMS could promote good clinical practice                                             | -3                       | -2                       | -1                       | 0                        | 1                        | 2                        | 3                        |
|                                                                                                         | <input type="checkbox"/> | <input type="checkbox"/> | <input type="checkbox"/> | <input type="checkbox"/> | <input type="checkbox"/> | <input type="checkbox"/> | <input type="checkbox"/> |
| 30. I would use the TMS if I receive appropriate training                                               | -3                       | -2                       | -1                       | 0                        | 1                        | 2                        | 3                        |
|                                                                                                         | <input type="checkbox"/> | <input type="checkbox"/> | <input type="checkbox"/> | <input type="checkbox"/> | <input type="checkbox"/> | <input type="checkbox"/> | <input type="checkbox"/> |
| 31. Other health professionals (specialist, nurses, GPs etc.) would welcome the fact that I use the TMS | -3                       | -2                       | -1                       | 0                        | 1                        | 2                        | 3                        |
|                                                                                                         | <input type="checkbox"/> | <input type="checkbox"/> | <input type="checkbox"/> | <input type="checkbox"/> | <input type="checkbox"/> | <input type="checkbox"/> | <input type="checkbox"/> |
| 32. In general, the TMS could be useful to improve the care of my patients                              | -3                       | -2                       | -1                       | 0                        | 1                        | 2                        | 3                        |
|                                                                                                         | <input type="checkbox"/> | <input type="checkbox"/> | <input type="checkbox"/> | <input type="checkbox"/> | <input type="checkbox"/> | <input type="checkbox"/> | <input type="checkbox"/> |
| 33. I have the intention to use the TMS routinely for the care of my patients                           | -3                       | -2                       | -1                       | 0                        | 1                        | 2                        | 3                        |
|                                                                                                         | <input type="checkbox"/> | <input type="checkbox"/> | <input type="checkbox"/> | <input type="checkbox"/> | <input type="checkbox"/> | <input type="checkbox"/> | <input type="checkbox"/> |
| 34. The use of the TMS could interfere with the usual follow-up of my patients                          | -3                       | -2                       | -1                       | 0                        | 1                        | 2                        | 3                        |
|                                                                                                         | <input type="checkbox"/> | <input type="checkbox"/> | <input type="checkbox"/> | <input type="checkbox"/> | <input type="checkbox"/> | <input type="checkbox"/> | <input type="checkbox"/> |
| 35. I think that the TMS will be easy to use                                                            | -3                       | -2                       | -1                       | 0                        | 1                        | 2                        | 3                        |
|                                                                                                         | <input type="checkbox"/> | <input type="checkbox"/> | <input type="checkbox"/> | <input type="checkbox"/> | <input type="checkbox"/> | <input type="checkbox"/> | <input type="checkbox"/> |
| 36. I would use the TMS if I receive the necessary technical assistance                                 | -3                       | -2                       | -1                       | 0                        | 1                        | 2                        | 3                        |
|                                                                                                         | <input type="checkbox"/> | <input type="checkbox"/> | <input type="checkbox"/> | <input type="checkbox"/> | <input type="checkbox"/> | <input type="checkbox"/> | <input type="checkbox"/> |

**Do you have any comments?**

---



---

**Thank you very much for your cooperation!**
